# Supplementary material for: Fabrication and Characterization of an Efficient Inverted Perovskite Solar Cells with POSS Passivating Hole Transport Layer
Source: MDPI journal article supplement (doi:10.3390/nano11040974), 2021-04-10
Supplement: s1 [file s1]

# Supporting Information

## Fabrication and Characterization of an Efficient Inverted Perovskite Solar Cells with POSS Passivating Hole Transport Layer

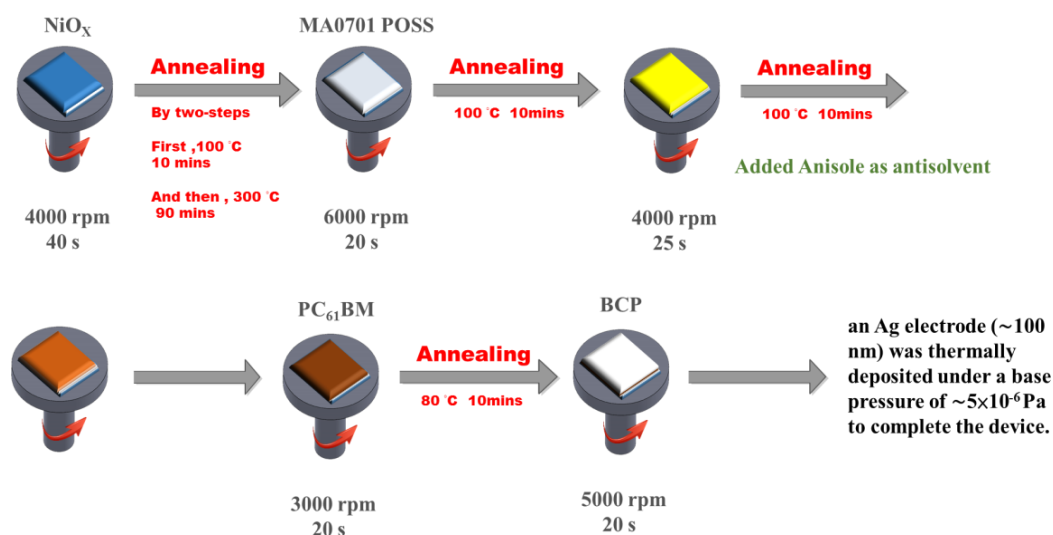

**Figure S1.** Schematic representation of PSCs with POSS passivation.

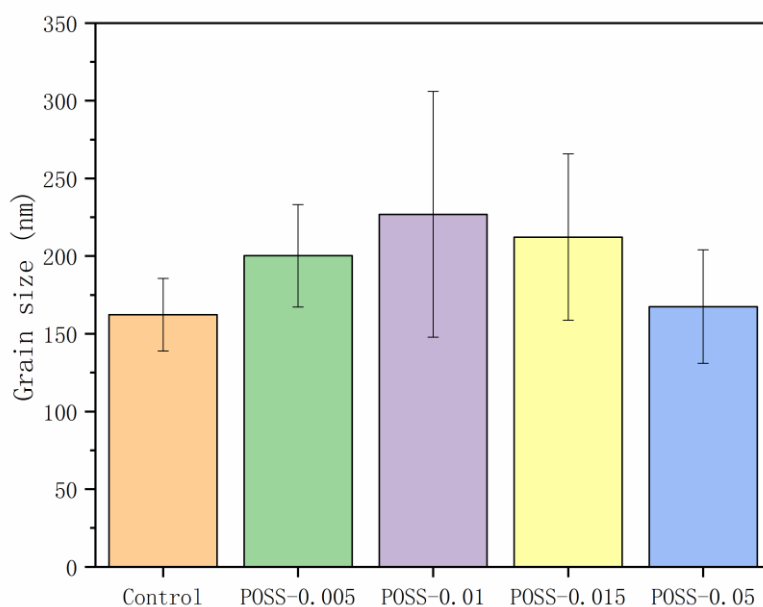

**Figure S2.** Average grain sizes of the MAPbI<sub>3</sub> layers over various FTO/NiO<sub>x</sub>/POSS substrates.

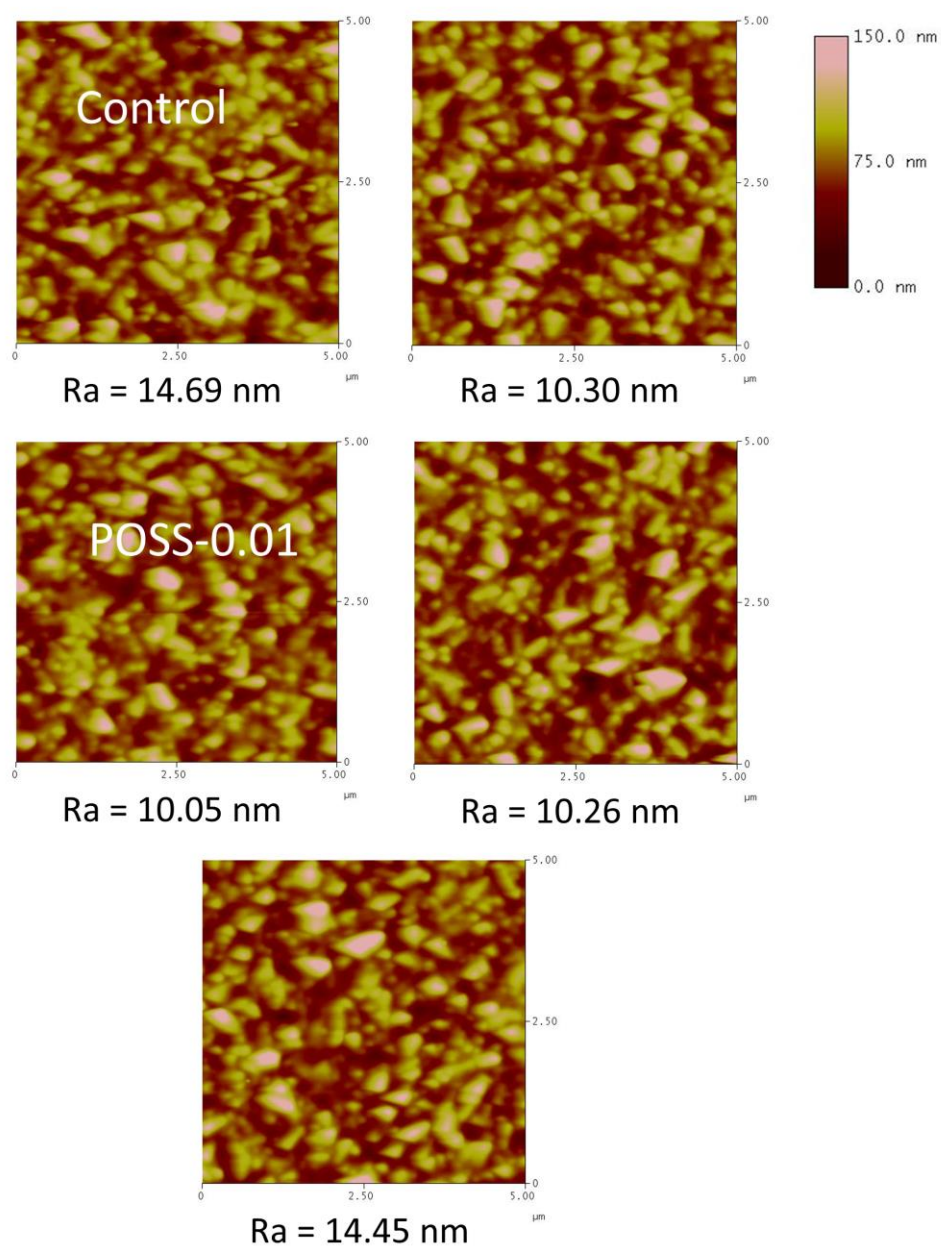

**Figure S3.** AFM topography images of the FTO/NiO<sub>x</sub>/POSS with various POSS contents.

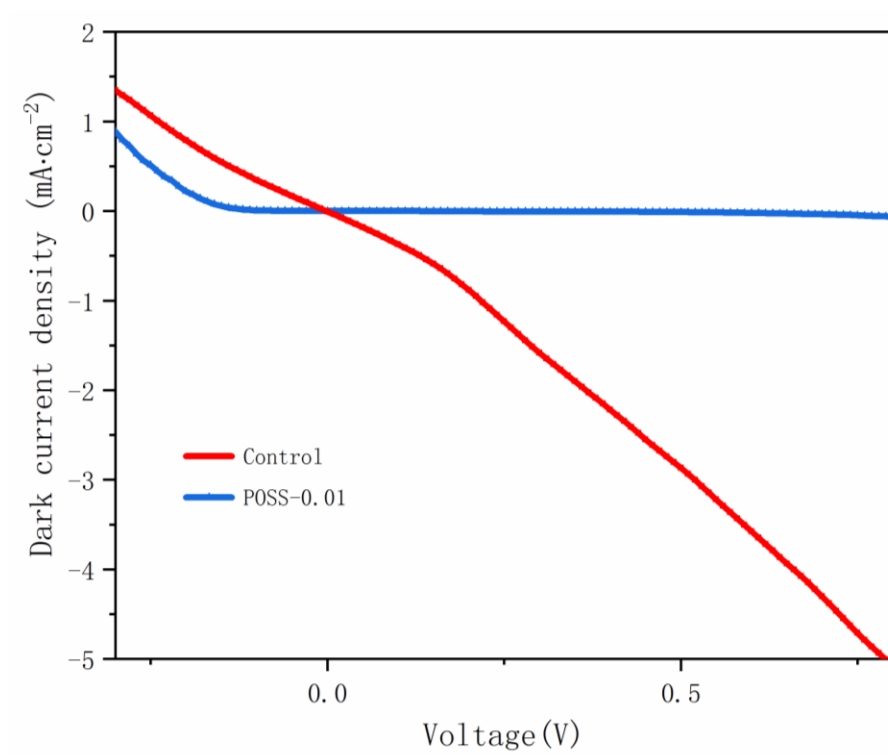

**Figure S4.** Dark current-voltage curves of the control cell and the champion cell.
